# Supplementary material
Source: PubMed Central journal article supplement (PMC4171006)
Supplement: mabs-6-1026-s01.pdf [file mabs-6-1026-s01.pdf]

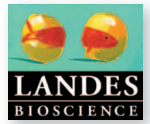

## **Supplemental Material to:**

**Marie Vincent, Géraldine Teppaz, Laurie Lajoie, Véronique Solé, Anne Bessard, Mike Maillason, Séverine Loisel, David Béchard, Béatrice Clémenceau, Gilles Thibault, Laure Garrigue-Antar, Yannick Jacques, and Agnès Quéméner**

**Highly potent anti-CD20-RLI immunocytokine targeting established human B lymphoma in SCID mouse**

**mAbs 2014; 6(4)**

**<http://dx.doi.org/10.4161/mabs.28699>**

**<https://www.landesbioscience.com/journals/mabs/article/28699/>**

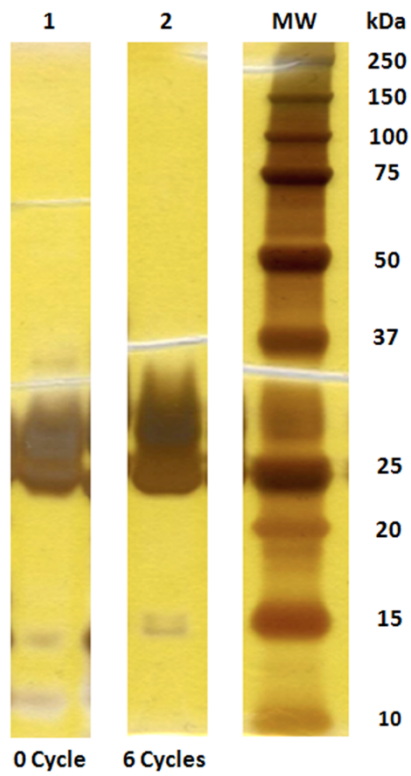

**Figure S1:** *Stability of RLI.* Silver stain SDS-PAGE under reducing conditions: lane 1: 1 $\mu$ g of freshly defrozed RLI, lane 2: 1 $\mu$ g of RLI after 6 freeze-thaw cycles. MW: Molecular Weight; kDa: kilo Dalton.

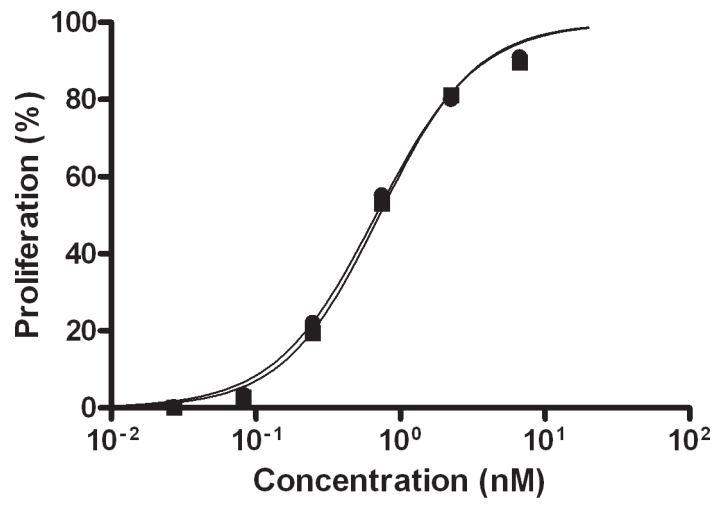

**Figure S2:** *Maintening of the activity of RLI.* 32Dβ cell proliferation induced by increasing concentrations of RLI freshly defrosted (●) or after 6 successive freeze-thaw cycles (■).
